# Supplementary material for: Achieving per-flow and weighted fairness for uplink and downlink in IEEE 802.11 WLANs
Source: Springer Nature journal article supplement (doi:10.1186/1687-1499-2012-239), 2012-07-31

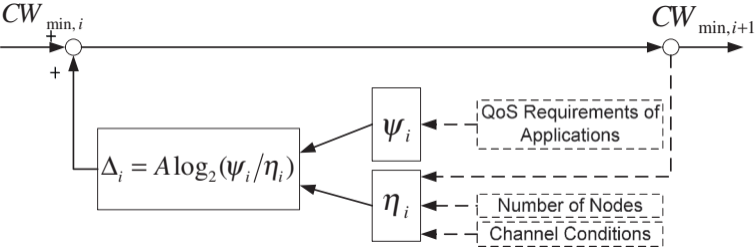

Supplement: 13638_2012_420_MOESM4_ESM.pdf [file 13638_2012_420_MOESM4_ESM.pdf]
